# Supplementary material
Source: MDPI journal article supplement (https://www.mdpi.com/2073-4395/14/1/39)
Supplement: s1 [file s1]

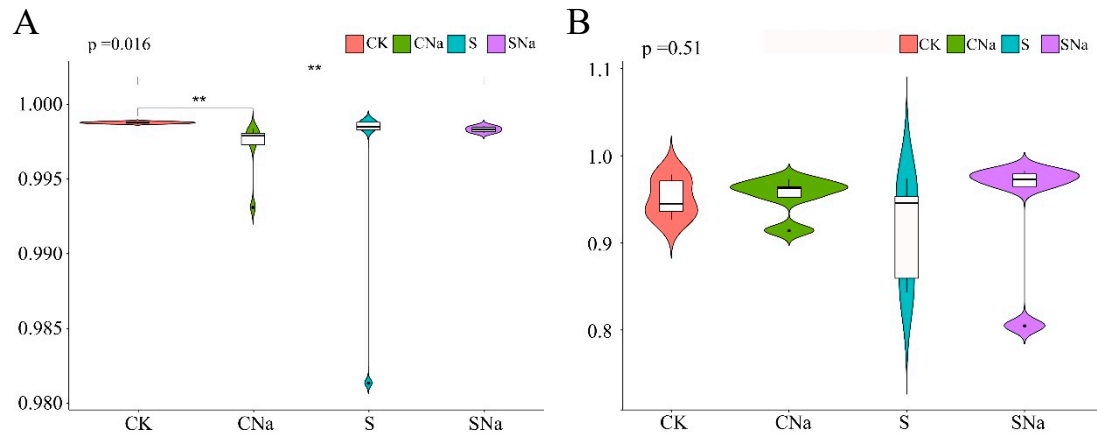

Figure S1. Difference in bacterial, fungal alpha diversity (Simpson analysis) among the treatments. (The data are presented as the mean  $\pm$  SD of three independent replicates. CK, CNa, S, and SNa represent control check soil, additive NaCl soil, HU2014 soil, and inoculating HU2014 soil with the addition of NaCl, respectively.) Asterisk indicates significant differences ( $P < 0.05$ ) between treatments.

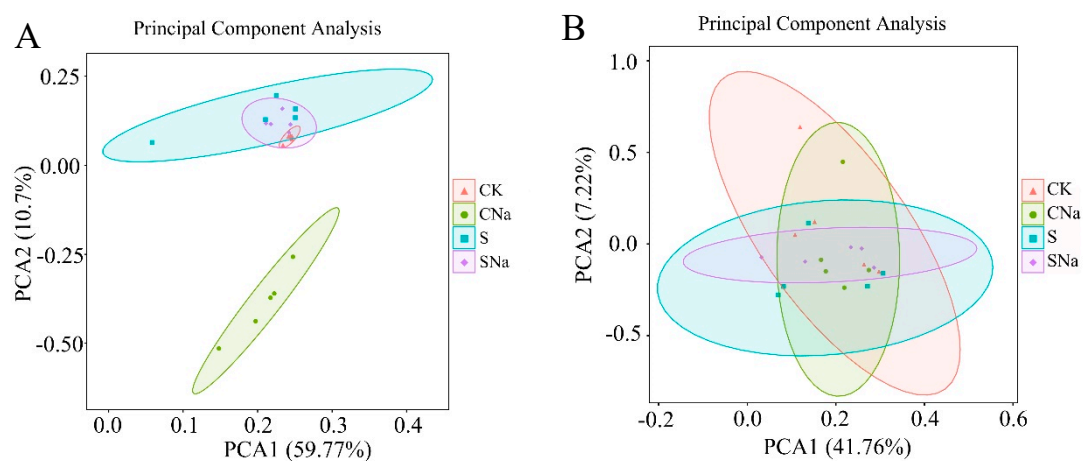

Figure S2. Principal component analysis of the Bray-Curtis distance for soil bacterial and fungal communities. CK, CNa, S, and SNa represent control check soil, additive NaCl soil, HU2014 soil, and inoculating HU2014 soil with the addition of NaCl, respectively.

Table S1. The results of showing the effects of additive NaCl, inoculation, and their interactions on soil properties.

| T   | TSS<br>(%) | NH <sub>4</sub> <sup>+</sup> -N<br>(mg/kg) | NO <sub>3</sub> <sup>-</sup> -N<br>(mg/kg) | Olsen-P<br>(mg/kg) | pH         | SOC<br>(mg/kg) | TN<br>(g/kg) | TP<br>(g/kg) |
|-----|------------|--------------------------------------------|--------------------------------------------|--------------------|------------|----------------|--------------|--------------|
| CK  | 0.04±0.00d | 39.25±1.99a                                | 36.36±3.32c                                | 167.11±3.29d       | 8.31±0.01a | 50.45±0.22a    | 1.33±0.01c   | 1.09±0.04b   |
| CNa | 0.29±0.02b | 31.03±0.62c                                | 42.33±1.12b                                | 172.51±4.78c       | 7.78±0.00c | 50.52±0.08a    | 1.28±0.03d   | 1.10±0.07b   |
| S   | 0.09±0.01c | 32.88±1.40bc                               | 46.29±3.28b                                | 206.42±2.80b       | 7.98±0.00b | 50.83±0.48a    | 1.50±0.04a   | 1.23±0.09a   |
| SNa | 0.35±0.01a | 33.53±1.07b                                | 63.55±4.10a                                | 225.58±2.67a       | 7.97±0.01b | 50.76±0.26a    | 1.38±0.02b   | 1.25±0.10a   |

CK, CNa, S, and SNa represent control check soil, additive NaCl soil, HU2014 soil, and inoculating HU2014 soil with the addition of NaCl, respectively. Values are the means (± SD) of five replicate soil samples. Different lowercase letters within a row indicate significant differences ( $P < 0.05$ ) between different treatments with the Tukey test. T: treatment; TSS: Total soluble salt; NH<sub>4</sub><sup>+</sup>, NH<sub>4</sub><sup>+</sup>-N content; NO<sub>3</sub><sup>-</sup>, NO<sub>3</sub><sup>-</sup>-N content; Olsen-P content; SOC, soil organic-carbon content; TN, total nitrogen content; TP, total phosphorus content.

Table S2. The effects of HU2014 inoculation and NaCl addition on relative abundances of bacterial taxa of top 10 (phylum level).

| Taxa              | CK (RA%)    | CNa (RA%)   | S (RA%)     | SNa (RA%)    | Total (RA%) | p_value |
|-------------------|-------------|-------------|-------------|--------------|-------------|---------|
| Proteobacteria    | 36.93±0.94b | 43.96±2.94a | 41.46±4.00a | 44.48±1.29a  | 41.71       | 0.02    |
| Acidobacteriota   | 18.36±0.63a | 14.65±1.63b | 12.31±2.05c | 13.31±0.48bc | 14.66       | 0.01    |
| Actinobacteriota  | 8.93±1.01ab | 9.00±0.45ab | 11.53±5.34a | 6.67±0.14b   | 9.03        | 0.01    |
| Bacteroidota      | 5.13±0.49c  | 5.65±0.47c  | 6.62±0.74b  | 7.63±0.37a   | 6.26        | 0.00    |
| Gemmatimonadota   | 6.36±0.74ab | 6.09±0.45ab | 5.41±0.92b  | 6.60±0.37a   | 6.11        | 0.11    |
| Firmicutes        | 4.45±0.36a  | 4.14±0.70a  | 6.25±2.65a  | 5.63±0.83a   | 5.12        | 0.08    |
| Planctomycetota   | 4.70±0.43a  | 3.64±0.76b  | 3.83±0.65ab | 4.02±0.44ab  | 4.04        | 0.13    |
| Chloroflexi       | 3.91±0.29a  | 3.29±0.34b  | 3.19±0.41b  | 3.04±0.16b   | 3.36        | 0.02    |
| Myxococcota       | 3.54±0.15a  | 2.49±0.46bc | 2.97±0.48b  | 2.22±0.16c   | 2.80        | 0.01    |
| Verrucomicrobiota | 2.51±0.19a  | 1.89±0.17b  | 2.00±0.42b  | 2.14±0.23ab  | 2.13        | 0.03    |

CK, CNa, S, and SNa represent control check soil, additive NaCl soil, HU2014 soil, and inoculating HU2014 soil with the addition of NaCl, respectively. Values are the means ( $\pm$  SD) of five replicate soil samples. Different lowercase letters within a row indicate significant differences ( $P < 0.05$ ) between different treatments with the Tukey test.

Table S3. The effects of HU2014 inoculation and NaCl addition on relative abundances of fungal taxa of top 6 (phylum level).

| Taxa               | CK (RA%)    | CNa (RA%)   | S (RA%)       | SNa(RA%)     | Total (RA%) | P value |
|--------------------|-------------|-------------|---------------|--------------|-------------|---------|
| Ascomycota         | 73.38±8.44a | 73.69±6.06a | 70.17±15.86a  | 64.18±16.13a | 70.36       | 0.70    |
| Fungi_unclassified | 3.88±0.73b  | 15.13±5.88a | 10.75±11.63ab | 9.43±3.38ab  | 9.79        | 0.02    |
| Basidiomycota      | 6.79±7.81a  | 2.84±0.79a  | 10.72±14.93a  | 13.72±19.93a | 8.52        | 0.84    |
| Zygomycota         | 7.01±2.51a  | 6.30±3.04a  | 4.59±2.57a    | 7.97±2.98a   | 6.47        | 0.37    |
| Chytridiomycota    | 5.24±8.50a  | 0.93±0.56a  | 2.12±1.73a    | 3.29±0.77a   | 2.89        | 0.06    |
| Olpidiomycota      | 3.25±2.28a  | 1.02±1.09a  | 1.58±0.93a    | 1.10±0.78a   | 1.74        | 0.15    |

CK, CNa, S, and SNa represent control check soil, additive NaCl soil, HU2014 soil, and inoculating HU2014 soil with the addition of NaCl, respectively. Values are the means ( $\pm$  SD) of five replicate soil samples. Different lowercase letters within a row indicate significant differences ( $P < 0.05$ ) between different treatments with the Tukey test.
